# Supplementary material for: Isolation and molecular characterisation of Achromobacter phage phiAxp-3, an N4-like bacteriophage
Source: PubMed Central journal article supplement (PMC4837373; doi:10.1038/srep24776), 2016-04-20
Supplement: srep24776-s1.pdf [file srep24776-s1.pdf]

**Isolation and molecular characterisation of *Achromobacter* phage phiAxp-3, an N4-like bacteriophage**

Yanyan Ma<sup>1#</sup>, Erna Li<sup>2#</sup>, Zhizhen Qi<sup>3#</sup>, Huan Li<sup>4</sup>, Xiao Wei<sup>4</sup>, Weishi Lin<sup>4</sup>, Ruixiang Zhao<sup>1</sup>, Aimin Jiang<sup>2</sup>, Huiying Yang<sup>5</sup>, Zhe Yin<sup>5\*</sup>, Jing Yuan<sup>4\*</sup>, Xiangna Zhao<sup>4\*</sup>

<sup>1</sup>College of Food Science, Henan Institute of Science and Technology, Xinxiang, China, 453003

<sup>2</sup>College of Food Science, South China Agricultural University, Guangzhou, China, 510642

<sup>3</sup>Qinghai Institute for Endemic Disease Prevention and Control of Qinghai Province, Xining, China, 810000

<sup>4</sup>Institute of Disease Control and Prevention, Academy of Military Medical Sciences, Beijing, China, 100071

<sup>5</sup>State Key Laboratory of Pathogen and Biosecurity, Beijing Institute of Microbiology and Epidemiology, Beijing, China, 100071

#: These authors contributed equally to this work.

\*Correspondence: Zhe Yin, State Key Laboratory of Pathogen and Biosecurity, Beijing Institute of Microbiology and Epidemiology, Beijing, China; Jing Yuan, Institute of Disease Control and Prevention, Academy of Military Medical Sciences, Beijing, China; Xiangna Zhao, Institute of Disease Control and Prevention, Academy of Military Medical Sciences, Beijing, China

Tel: +86-10-66948434; Fax: +86-10-66948301

E-mail: [jerry9yin@163.com](mailto:jerry9yin@163.com); [yuanjing6216@163.com](mailto:yuanjing6216@163.com); [xnazhao@163.com](mailto:xnazhao@163.com)

## Supplementary Figure legends

Supplementary Figure 1. Schematic illustration of the structure and linearity of phiAxp-3 genomic ends. (a) Restriction fragment length polymorphism analysis of phiAxp-3 DNA. Genomic DNA from phage phiAxp-3 was digested with the enzymes indicated (*BlpI* and *EagI*) and run on an agarose gel (0.7%). (b) Sequence analysis of the ends of the phiAxp-3 genome. Black arrows indicate the oligonucleotide primers (P1 and P2) that were used, and the line with two arrowheads indicates the end fragments produced by genome digestion with *BlpI* and *EagI* restriction enzymes. Genome numbering of the sequences is that of the revised sequence. The repeat regions are shown in black at both ends of the genome. (c) Diagram showing the arrangement of the phiAxp-3 genome as originally sequenced and the revised genome arrangement.

Supplementary Figure 2. Multiple sequence alignment of the direct terminal repeats of phage phiAxp-3 with JWAalpha and JWDelta. The alignment was performed using ClustalX. Positions with a single, fully conserved base pair are indicated by an asterisk (\*).

**a**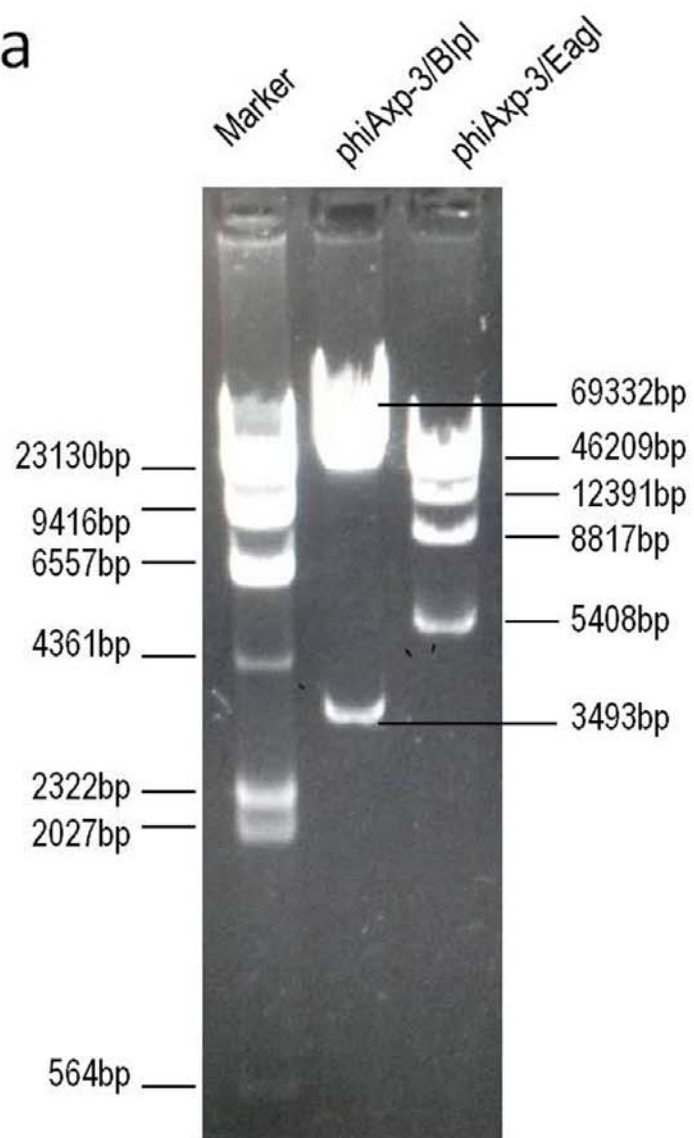**b**

### End sequencing of phiAxp-3 genomic DNA

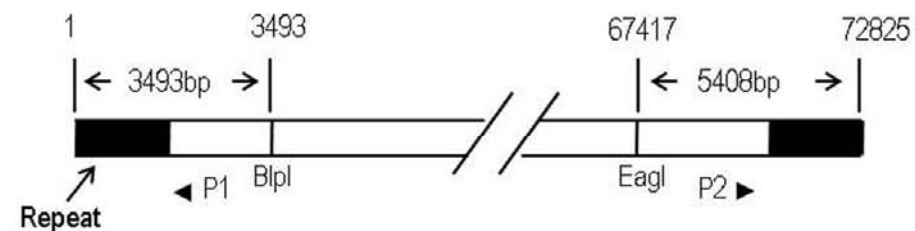

P1: TGATCGACATGGTAATACTCC

P2: ACTACTACAAGAACATTAC

**c**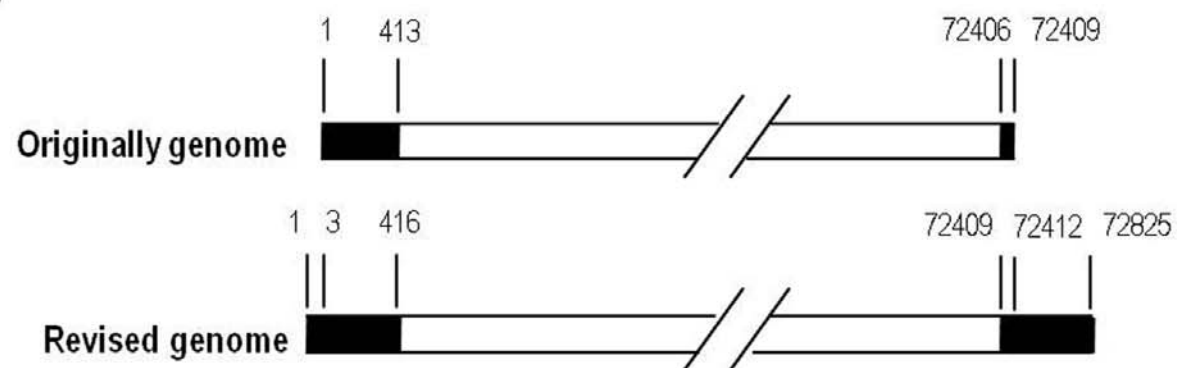

JWAlpha -----ACACACCCCCCGGTGTCTTGCTCCTGTGCAC  
JWDelta -----CCCCCGGTGTCTTGCTCCTGTGCAC  
phiAxp-3 TATGTGTACACGGTACACCCTACACTTTATACACCCCCCGGGTCTCTC-CTAGCCCAC  
\*\*\*\*\* \*\* \* \* \* \*\*

JWAlpha CTCTACCCA--CCCCATGTTGTTGACGCTCCGCGTCTTGTGGGTCTGTTGCCTATCATC  
JWDelta CTCTACCCA--CCCCATGTTGTTGACGCTCCGCGTCTTGTGGGTCTGTTGCCTATCATC  
phiAxp-3 ACCTACCCTACCCCCCATGTTTCTGACGCTCCGCGTCTTCTGGGTATGTTGCC---CATC  
\*\*\*\*\* \*\*\*\*\* \*\*\*\*\* \*\*\*\*\* \*\*\*\*\* \*\*\*\*\*

JWAlpha TATCAATCTTCTTAGGAGTATTAAC-ATGTCCACTTCCACCGCTCGCATGACCATCGGCT  
JWDelta TATCAATCTTCTTAGGAGCATTAAAC-ATGTCCACTTCCACCGCTCGCATGACCATCGGCT  
phiAxp-3 TATC--TTTCTTTAGGAGTATCAACTATGTCCACGTCCACCGCTCGCCTGACCATCGGCT  
\*\*\*\*\* \* \* \*\*\*\*\* \*\* \*\*\* \*\*\*\*\* \*\*\*\*\* \*\*\*\*\* \*\*\*\*\*

JWAlpha CTGCTCTCGGTACGATCAATACCGCTGCGCTTACCATCTCGTCCACTCTGGATGCAGTTG  
JWDelta CTGCTCTCGGTACGATCAATACCGCTGCGCTTACCATCTCTTCCACTCTGGATGCAGTTG  
phiAxp-3 CTCTGCTCGGTACCGTGAATACTGCCGCCATCACCGTGTCTCGTCCACTCTGGATGCTGCTG  
\*\* \*\*\*\*\* \* \*\*\*\*\* \*\* \*\* \* \*\* \* \*\* \*\*\*\*\* \*\*\*\*\* \*\* \*\*

JWAlpha GCTCTGGTGTGGTATGCTCAACGCCATGGTTGACAAGGCTGCTCGTGAACAACGTATGC  
JWDelta GCTCTGGTGTGGTATGCTCAACGCCATGGTTGACAAGGCTGCTCGTGAACAACGTATGC  
phiAxp-3 GTGCTGCTGTCGGTATGCTCAACTCTGCTGTCTCCAAGGCAGCTAAAGAGCAAGCTATCC  
\* \*\*\* \*\* \*\*\*\*\* \* \*\* \*\*\*\*\* \*\* \*\* \*\* \*\* \*\* \*\* \*\* \*\* \*\* \*

JWAlpha GTCACAAAGCTGACGTCTCCGAGTTCAAGCACCGTCTCATCAACGAAGTAGCTATGGCTC  
JWDelta GTCACAAAGCTGACGTCTCCGAGTTCAAGCACCGTCTCATCAACGAAGTAGCTATGGCTC  
phiAxp-3 GTCACAAAGTTGACGTCAACGAGTTCAAGAGTCGCTGATCATGGAAGTCTCCATGGCTC  
\*\*\*\*\* \* \*\*\*\*\* \*\*\*\*\* \*\* \*\* \*\*\*\*\* \*\*\*\*\* \* \*\*\*\*\*

JWAlpha GTGCACAACGTGAACGTCAAGTCATAGAGTTCTGCA-----  
JWDelta GTGCACAACGTGAACGTCAAGTCATAGAGTTCTGCAAGGACAAGGACAATGAAACCTTGT  
phiAxp-3 GTGCTCAACGTGAGCGTCAAGTAGTAGAGTTCTGCAAGGACTCTGTCAACGAGAAGCTCT  
\*\*\*\*\* \*\*\*\*\* \*\*\*\*\* \*\*\*\*\* \*\*\*\*\*

JWAlpha -----  
JWDelta ACTCCAAGGCTCACGACGAACTCACCGAGTTGCTCAAG  
phiAxp-3 TC-----
